# Supplementary material for: Acute Myeloid Leukemia Skews Therapeutic WT1-specific CD8 TCR-T Cells Towards an NK-like Phenotype that Compromises Function and Persistence
Source: PubMed Central journal article supplement — medRxiv. 2024 Dec 16:2024.12.13.24318504. Preprint. [Version 1] doi: 10.1101/2024.12.13.24318504 (PMC11702715; doi:10.1101/2024.12.13.24318504), 2024-12-16
Supplement: media-1.pdf [file media-1.pdf]

# UOVcdig'3

| Patients characteristics                              |                                |        |
|-------------------------------------------------------|--------------------------------|--------|
| Age, years                                            | Median                         | 40     |
|                                                       | Range                          | 3 - 74 |
| Gender                                                | Male                           | 40%    |
|                                                       | Female                         | 60%    |
| ELN risk stratification                               | Favorable/Intermediate         | 53%    |
|                                                       | Adverse                        | 47%    |
| Other AML characteristics                             | Secondary or treatment-related | 27%    |
| T <sub>TCRC4</sub> virus-specificity                  | CMV                            | 33%    |
|                                                       | EBV                            | 67%    |
| Number of allo-HCT before T <sub>TCRC4</sub> infusion | 1                              | 60%    |
|                                                       | 2                              | 40%    |
| Disease status at 1st T <sub>TCRC4</sub> infusion     | CR <sub>MRD-</sub>             | 53%    |
|                                                       | CR <sub>MRD+</sub>             | 33%    |
|                                                       | Refractory                     | 13%    |
| Lymphodepletion                                       | y                              | 20%    |
|                                                       | n                              | 80%    |
| GVHD after T <sub>TCRC4</sub> infusion                | aGVHD                          | 13%    |
|                                                       | cGVHD                          | 20%    |

# U0Vcdng'4

| NCI CTCAE v4.0*                      |                                                            | Definitely/probably associated with TTCR-C4 |         | Unrelated/unlikely** associated with TTCR-C4 |         |         |
|--------------------------------------|------------------------------------------------------------|---------------------------------------------|---------|----------------------------------------------|---------|---------|
|                                      |                                                            | Grade 3                                     | Grade 4 | Grade 3                                      | Grade 4 | Grade 5 |
| Cytokine-mediated                    | Cytokine Release Syndrome (fevers, chills, rigors, nausea) | 2                                           |         | 1                                            |         |         |
| Blood and lymphatic system disorders | Lymphopenia                                                | 5                                           | 2       | 3                                            | 3       |         |
|                                      | Thrombocytopenia                                           | 5                                           | 2       | 7                                            | 6       |         |
|                                      | Neutrophil count decreased                                 | 8                                           | 1       | 12                                           | 9       |         |
|                                      | Anemia                                                     | 2                                           |         | 15                                           |         |         |
| GVHD-associated                      | Anorexia                                                   |                                             |         | 1                                            |         |         |
|                                      | Diarrhea                                                   |                                             |         | 1                                            |         |         |
|                                      | Maculo-papular rash                                        | 1                                           |         | 3                                            |         |         |
|                                      | Hypoxia                                                    | 1                                           |         | 1                                            |         |         |
|                                      | Reduced joint range of motion                              |                                             |         | 1                                            |         |         |
|                                      | Skin sclerosis                                             |                                             |         | 1                                            |         |         |
| Metabolic/renal disorders            | Hypokalemia                                                |                                             |         | 2                                            | 1       |         |
|                                      | Hyponatremia                                               |                                             |         | 10                                           |         |         |
|                                      | Hypophosphatemia                                           |                                             |         | 4                                            |         |         |
|                                      | Proteinuria                                                |                                             |         | 1                                            |         |         |
|                                      | Hypocalcemia                                               |                                             |         | 2                                            |         |         |
|                                      | Hypoalbuminemia                                            |                                             |         | 1                                            |         |         |
|                                      | Hyperglycemia                                              |                                             |         | 7                                            |         |         |
|                                      | Chronic Kidney Disease                                     |                                             |         | 1                                            |         |         |
| Miscellaneous                        | Infection                                                  |                                             |         | 6                                            | 1       |         |
|                                      | Hypotension                                                | 2                                           |         | 1                                            |         |         |
|                                      | Hypertension                                               | 2                                           |         |                                              |         |         |
|                                      | Peripheral motor neuropathy                                |                                             |         | 1                                            |         |         |
|                                      | Fatigue                                                    |                                             |         | 2                                            |         |         |
|                                      | Duodenal Obstruction                                       |                                             |         | 1                                            |         |         |
|                                      | Abdominal pain                                             |                                             |         | 1                                            |         |         |
|                                      | Rectal Pain                                                | 1                                           |         |                                              |         |         |
|                                      | Nausea                                                     |                                             |         | 1                                            |         |         |
|                                      | Aspartate Aminotransferase increased                       | 1                                           |         |                                              | 1       |         |
|                                      | Mucositis oral                                             |                                             |         | 2                                            |         |         |
|                                      | Dry Mouth                                                  |                                             |         | 1                                            |         |         |
|                                      | Pulmonary Edema                                            |                                             |         |                                              | 1       |         |
|                                      | Multi-organ Failure                                        |                                             |         |                                              |         | 1       |
|                                      | Alopecia                                                   |                                             |         |                                              | 1       |         |
|                                      | Thromboembolic event                                       |                                             |         |                                              | 1       |         |
|                                      | Activated partial thromboplastin time prolonged            |                                             |         | 1                                            |         |         |
|                                      | Sinus tachycardia                                          |                                             |         | 1                                            |         |         |

, PcdqpcnEcepgt 'Kpukwg'Eqo o qp'Vgt o lppqi { 'Et lgt k'ht 'Cf xgt ug'Gxgpwixgt ukqp'60-', Cf xgt ug'xgpwif geqt f gf 'cu] cxlpi 'f ghplg'' qt 'rt qdcng'cuqekvqp'y kj 'VVET/E6'y gt g'eqpuk'gt gf 'tgrvfg'

## UVcdig'5

| <b>Spectral Flow-cytometry panel</b> |              |                        |
|--------------------------------------|--------------|------------------------|
| <b>Marker</b>                        | <b>Clone</b> | <b>Fluorescent Tag</b> |
| <b>TIGIT</b>                         | A15153G      | BV421                  |
| <b>CD197 (CCR7)</b>                  | 3D12         | BB700                  |
| <b>Ki-67</b>                         | B56          | BV480                  |
| <b>CD57</b>                          | NK-1         | BUV395                 |
| <b>CD45RA</b>                        | HI100        | BV570                  |
| <b>CD27</b>                          | O323         | BV605                  |
| <b>CD95 (FAS)</b>                    | DX29         | BV650                  |
| <b>CD127 (IL-7Ra)</b>                | A019D5       | BV711                  |
| <b>CD28</b>                          | CD28.2       | BV785                  |
| <b>T-Bet</b>                         | 4B10         | KIRAVIA Blue 520       |
| <b>CD8</b>                           | RPA-T8       | BUV737                 |
| <b>TCF1 (TCF7)</b>                   | C63D9        | PE                     |
| <b>CD279 (PD-1)</b>                  | EH12.2H7     | PE-Dazzle 594          |
| <b>CD69</b>                          | FN50         | PE-Cy5                 |
| <b>Granulysin</b>                    | DH2          | PE-Cy7                 |
| <b>KLRG1</b>                         | Z7-205.rMAb  | PerCP-eFluor 710       |
| <b>Granzyme K</b>                    | G3H69        | RB780                  |
| <b>Tetramer</b>                      |              | APC                    |
| <b>Granzyme B</b>                    | GB11         | Alexa Fluor 700        |
| <b>CD38</b>                          | HIT2         | APC-Fire 810           |
| <b>CD3</b>                           | UCHT1        | APC-Fire 750           |
| <b>CD366 (TIM3)</b>                  | F38-2E2      | PE-Fire 810            |
| <b>Viability</b>                     |              | LD Blue                |
| <b>CD33 (DUMP)</b>                   | WM53         | BV510                  |
| <b>CD14 (DUMP)</b>                   | 63D3         | BV510                  |

## UVcdrg'6

|     | Days after TTCRC4 infusion |    |    |     |
|-----|----------------------------|----|----|-----|
| IDs | T1                         | T2 | T3 | T4  |
| 126 | 1                          | 7  | 28 | 117 |
| 90  | 1                          | 7  | 28 | 110 |
| 683 | 3                          | 8  | 28 | 149 |

## UOVcdrg'7

| IDs | Days after first infusion |      |      |       |       | Arm          |
|-----|---------------------------|------|------|-------|-------|--------------|
| 10  | D320                      |      |      |       |       | Prophylactic |
| 18  | D253                      |      |      |       |       | Prophylactic |
| 4   | D100                      | D581 |      |       |       | Treatment    |
| 8   | D49                       | D265 | D405 | D1322 | D1343 | Treatment    |
| 15  | D97                       |      |      |       |       | Treatment    |
| 26  | D7                        | D28  |      |       |       | Treatment    |
| 27  | D21                       | D58  | D178 |       |       | Treatment    |

## UVcdg'8

| naïve-like | activation, memory | TTCR-C4 | interferon signaling genes | proliferation, memory | NK-like |
|------------|--------------------|---------|----------------------------|-----------------------|---------|
| CCR7       | CD69               | TCRC4   | ISG15                      | MKI67                 | KLRF1   |
| SELL       | TIGIT              |         | ISG20                      | MCM5                  | KIR3DL1 |
| TCF7       | GZMK               |         | IRF7                       | MCM7                  | NKG7    |
| LEF1       | IL7R               |         | IFI6                       | CD27                  | FCGR3A  |
| IL7R       | CXCR4              |         |                            |                       | GZMB    |
|            |                    |         |                            |                       | KLRD1   |
|            |                    |         |                            |                       | PRF1    |

## U0Vcdng'9

| Naïve-like | Tem  | ISG   | Tmem-prolif | NKL/TEMRA |
|------------|------|-------|-------------|-----------|
| CCR7       | GZMK | IFI6  | MKI67       | GNLY      |
| LEF1       | CD69 | IRF7  | PCNA        | PRF1      |
| LTB        | CCL4 | ISG20 | MCM2        | GZMB      |
| BACH2      | CCL5 | ISG15 |             | NKG7      |
| IL7R       | XCL1 |       |             | ZEB2      |
| TCF7       | XCL2 |       |             | S1PR5     |
|            |      |       |             | CXrCR1    |
|            |      |       |             | KLRD1     |
|            |      |       |             | KLRF1     |
|            |      |       |             | ZNF683    |
|            |      |       |             | CD226     |
|            |      |       |             |           |

# UOVedig'!

| ID | Days after 1st infusion | Status | Blasts    |
|----|-------------------------|--------|-----------|
| 10 | 320                     | AML-   | No blasts |
| 18 | 253                     | AML-   | No blasts |
| 4  | 100                     | AML-   | No blasts |
|    | 581                     | AML+   |           |
| 8  | 49                      | AML+   |           |
|    | 265                     | AML-   | No blasts |
|    | 405                     | AML+   | 12.50%    |
|    | 1322                    | AML+   | 0.30%     |
|    | 1343                    | AML+   | 0.20%     |
| 15 | 97                      | AML+   | 9.80%     |
| 26 | D7                      | AML+   |           |
|    | D28                     | AML+   | 9%        |
| 27 | 21                      | AML-   | No blasts |
|    | 58                      | AML-   | No blasts |
|    | 178                     | AML+   | 11%       |

Blasts identified via scRNAseq  
(Supplemental Figure 16)

Described in Lahman, M.C., et al. Targeting an alternate Wilms' tumor antigen 1 peptide bypasses immunoproteasome dependency. Science translational medicine 14, eabg8070-eabg8070 (2022).



# UVcdng'!

| Naïve-Like | Tem       | TTCRC4   | ISG     | Tmem/prolif | NKL/Temra | exhaustion |
|------------|-----------|----------|---------|-------------|-----------|------------|
| LTB        | GZMK      | TCRC4    | MX1     | HMOX1       | GZMH      | PDCD1      |
| SELL       | DUSP2     | GNLY     | ISG15   | GAPDH       | ZEB2      | LAG3       |
| NOSIP      | ZNF331    | PTMS     | IFI6    | STMN1       | NKG7      | HAVCR2     |
| LEF1       | NR4A2     | YBX3     | STAT1   | ACTG1       | TTC38     | CTLA4      |
| LEPROTL1   | FOS       | TRBV14   | IRF7    | CARHSP1     | S1PR5     | TIM3       |
| IL7R       | CSRNP1    | CMC1     | EIF2AK2 | MCM5        | GZMB      | LAG3       |
| TCF7       | ZFP36L2   | HOPX     | PARP9   | H2AFV       | CST7      | CD160      |
| CCR7       | JUNB      | TIGIT    | IFITM1  | CACYBP      | RAP1B     | BTLA       |
| PIK3IP1    | CXCR4     | RNF19A   | MX2     | ANP32B      | SYNGR1    | ENTPD1     |
| LDHB       | RGS1      | LAG3     | BST2    | HMGB2       | HLA-DRB5  |            |
| TMEM123    | DNAJB1    | UCP2     | LGALS9  | COX5A       | DIP2A     |            |
| SERINC5    | PTGER4    | CCL5     | TRIM22  | S1PR4       | S100A4    |            |
| NELL2      | IFNGR1    | FGFBP2   | CD28    | NUDT21      | FLNA      |            |
| PIM1       | CD27      | FDFT1    | UBE2L6  | HLA-DQB1    | KLRD1     |            |
| FOXP1      | DUSP1     | PDE4D    | EPSTI1  | HMGN2       | HLA-DRB1  |            |
| CAMK4      | PIK3R1    | ALOX5AP  | LY6E    | HLA-DMA     | EMP3      |            |
| PABPC1     | RHOH      | CD6      | IFI35   | RAD21       | HLA-DPB1  |            |
| PASK       | BTG1      | S100A10  | CHMP5   | CNN2        | YWHAQ     |            |
| BCL2       | SLC2A3    | H2AFZ    | OAS1    | TFDP1       | CLIC3     |            |
| RCAN3      | TSPYL2    | KLF3     | SAMD9L  | TUBA1B      | ANXA1     |            |
| OXNAD1     | CREM      | CLDND1   | SAT1    | HLA-DRA     | C12orf75  |            |
| SARAF      | ZFP36     | PPP1R18  | XAF1    | SAE1        | GSTP1     |            |
| FLT3LG     | PPP1R15A  | MARCKSL1 | TAP1    | SIRPG       | BATF      |            |
| DGKA       | PDE4B     | ADGRG1   | CARD16  | TUBB        | CCL4      |            |
| TRABD2A    | MAP3K8    | CD5      | ZBP1    | UQCRC1      | ABI3      |            |
| TXK        | IDI1      | ZNF683   | CD38    | ANXA5       | ARPC5L    |            |
| SOCS3      | CD74      | PRF1     | PLSCR1  | SLBP        | APOBEC3G  |            |
| CD55       | JUN       | EFHD2    | JAK2    | CDCA7       | LPCAT1    |            |
| SATB1      | GABARAPL1 | ITGB1    | GBP1    | FABP5       | FCRL6     |            |
| EEF1B2     | PMAIP1    | PLEK     | OAS3    | DENND2D     | DSTN      |            |
| PCED1B     | TNFAIP3   | SPON2    | TYMP    | PRDX3       | PTPN18    |            |
| PIM2       | EML4      | FCGR3A   | SAMD9   | SMC3        | CALR      |            |
| SESN3      | PPP2R5C   | PRSS23   | SUB1    | DUT         | FGR       |            |
| TPT1       | ISG20     |          | LYST    | NASP        | CD3G      |            |
| MYC        | SPOCK2    |          | OAS2    | ANP32E      | ADRB2     |            |
| FHIT       | ARL4C     |          | LDHA    | CD81        | C1orf21   |            |
| ABLIM1     | RSL24D1   |          | SLFN5   | MKI67       |           |            |
| TNFSF8     | FYN       |          | PPM1K   | MCM7        |           |            |
| SNX9       | MCL1      |          | IFIT3   | TOX         |           |            |
| SPINT2     | KLRB1     |          | HSH2D   | CXCR3       |           |            |
| EEF1A1     | COTL1     |          | OASL    | PCNA        |           |            |
| PLP2       |           |          | GBP4    | MCM3        |           |            |
| NFKBIZ     |           |          |         |             |           |            |
| INPP4B     |           |          |         |             |           |            |
| EIF3E      |           |          |         |             |           |            |
| NPM1       |           |          |         |             |           |            |
| SNHG8      |           |          |         |             |           |            |
| CD69       |           |          |         |             |           |            |
| VIM        |           |          |         |             |           |            |
| EIF3L      |           |          |         |             |           |            |

**S. Table 10**

| Naïve-like | Tem  | NKL/Temra | Exhaustion |
|------------|------|-----------|------------|
| CCR7       | CCL2 | GNLY      | PDCD1      |
| LEF1       | CCL5 | ADGRG1    | LAG3       |
| IL7R       | XCL2 | KLRD1     | HAVCR2     |
| LTB        | XCL1 | KLRB1     | CTLA4      |
| SELL       | CD69 | KIR2DL4   | HAVCR2     |
| TCF7       | GZMK | PRF1      | LAG3       |
|            | IFNG | KLRC1     | CD160      |
|            |      | KLRG1     | BTLA       |
|            |      | B3GAT1    | ENTPD1     |
|            |      | S1PR5     |            |
|            |      | ZEB2      |            |
|            |      | NKG7      |            |
|            |      | FCRL6     |            |
|            |      | KLRC2     |            |
|            |      | NCAM1     |            |
